# Supplementary material for: Large-eddy simulation and stochastic modelling of Lagrangian particles for footprint determination in stable boundary layer
Source: Copernicus journal article supplement (doi:10.5194/gmd-2016-34), 2016-02-29
Supplement: Supplementary file 1 [file gmd-2016-34-supplement.zip]

Archive with 3 entries (3 files):
- Supl_data_description_Glazunov_et_al_footprint.pdf
- Supl-data.zip
- Supplement_Footprint_Glazunov_et_al.pdf
